# Supplementary material for: Decline in Etesian winds after large volcanic eruptions in the last millennium
Source: Copernicus journal article supplement (doi:10.5194/wcd-3-811-2022), 2022-07-29
Supplement: Supplementary file 1 [file wcd-3-811-2022-supplement.pdf]

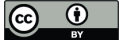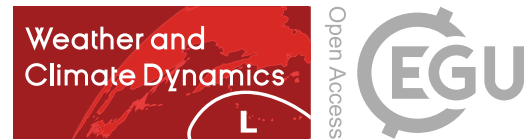

*Supplement of*

## **Decline in Etesian winds after large volcanic eruptions in the last millennium**

**Stergios Misios et al.**

*Correspondence to:* Stergios Misios ([smisios@noa.gr](mailto:smisios@noa.gr))

The copyright of individual parts of the supplement might differ from the article licence.

# Supplementary Material: Decline of Etesian winds after large volcanic eruptions in the last millennium

Stergios Misios<sup>1,2</sup>, Ioannis Logothetis<sup>3</sup>, Mads F. Knudsen<sup>2,4</sup>, Christoffer Karoff<sup>2,4</sup>, Vassilis Amiridis<sup>1</sup>, Kleareti Tourpali<sup>3</sup>

<sup>1</sup> Institute for Astronomy, Astrophysics, Space Applications, and Remote Sensing, National Observatory of Athens, Athens, Greece

<sup>2</sup> Department of Geoscience, Aarhus University, Aarhus, Denmark

<sup>3</sup> Aristotle University of Thessaloniki, Thessaloniki, Greece

<sup>4</sup> iCLIMATE Interdisciplinary Centre for Climate Change, Aarhus University, Aarhus, Denmark

Correspondence to: Stergios Misios (smisios@noa.gr)

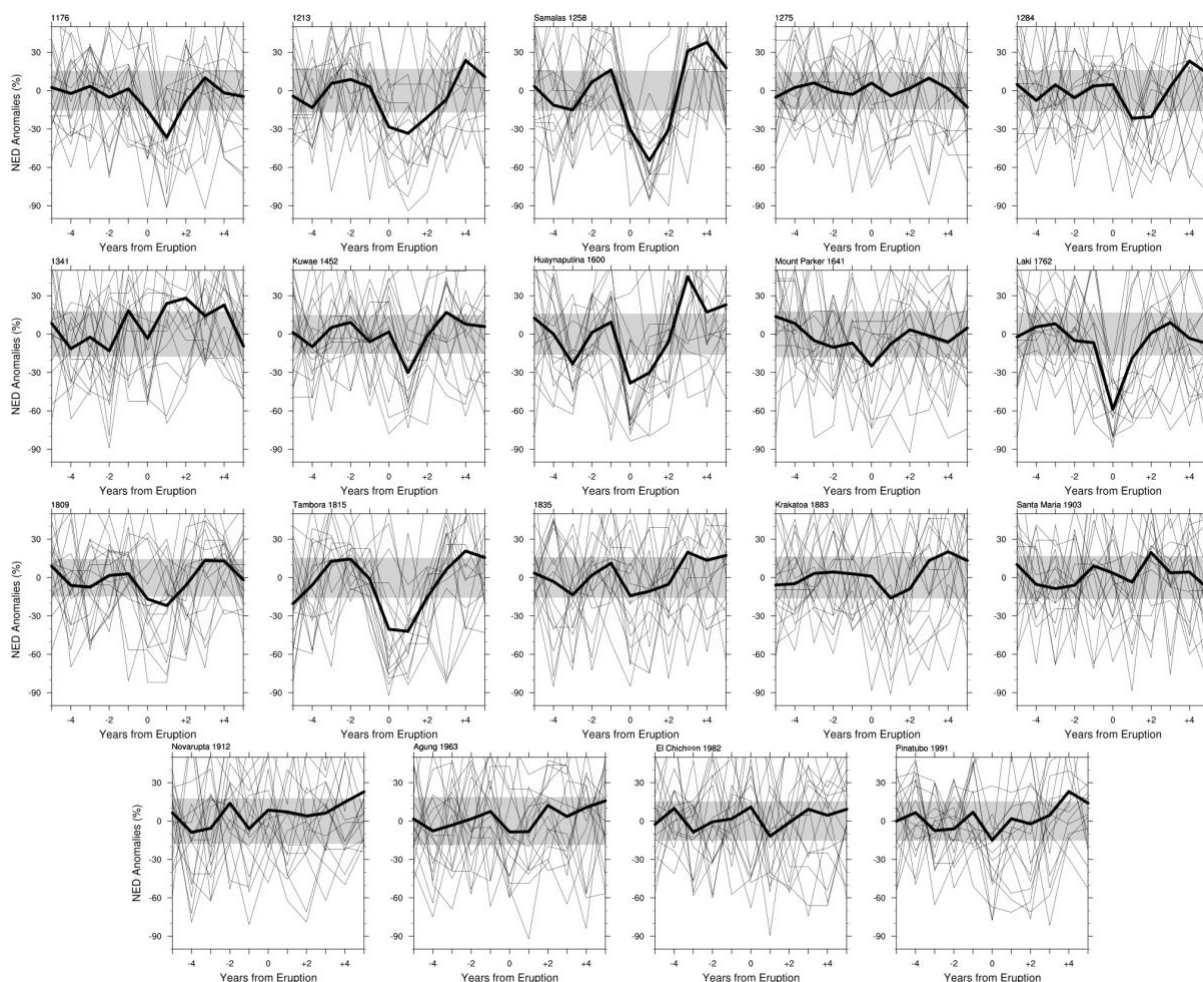

Figure S1 Similar to Figure 3 but for all selected strong eruptions from 850 to 2005 listed in Table 1.

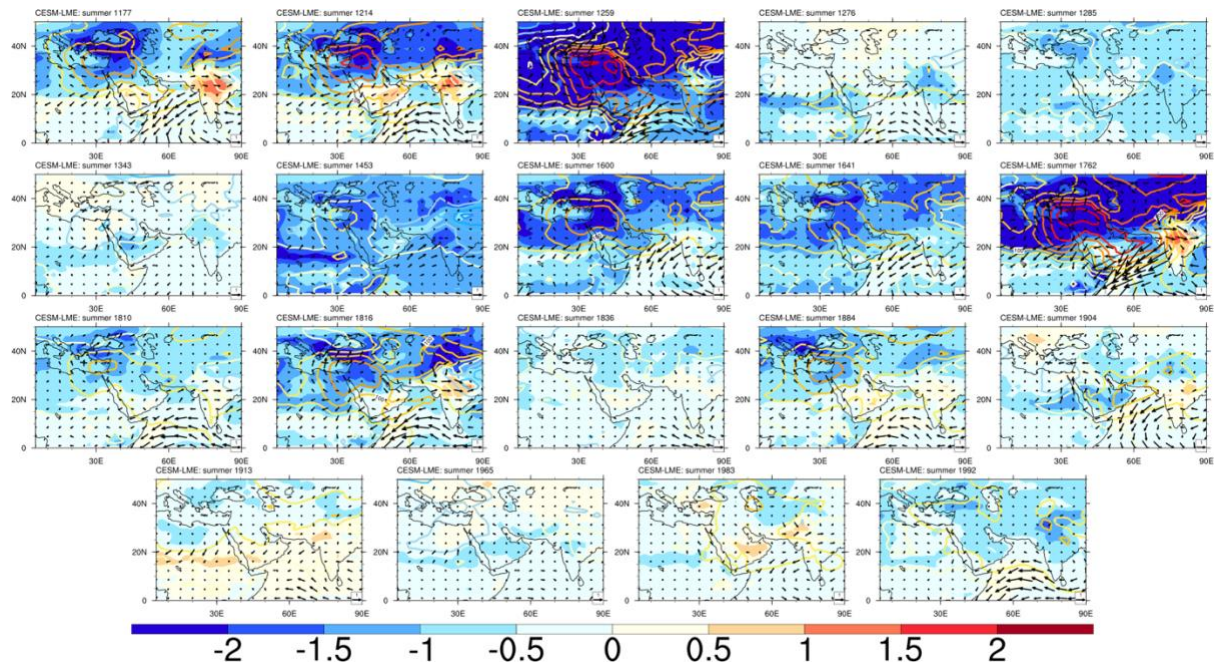

Figure S2 Similar to Figure 5 but for all selected strong eruptions from 850 to 2005 listed in Table 1.

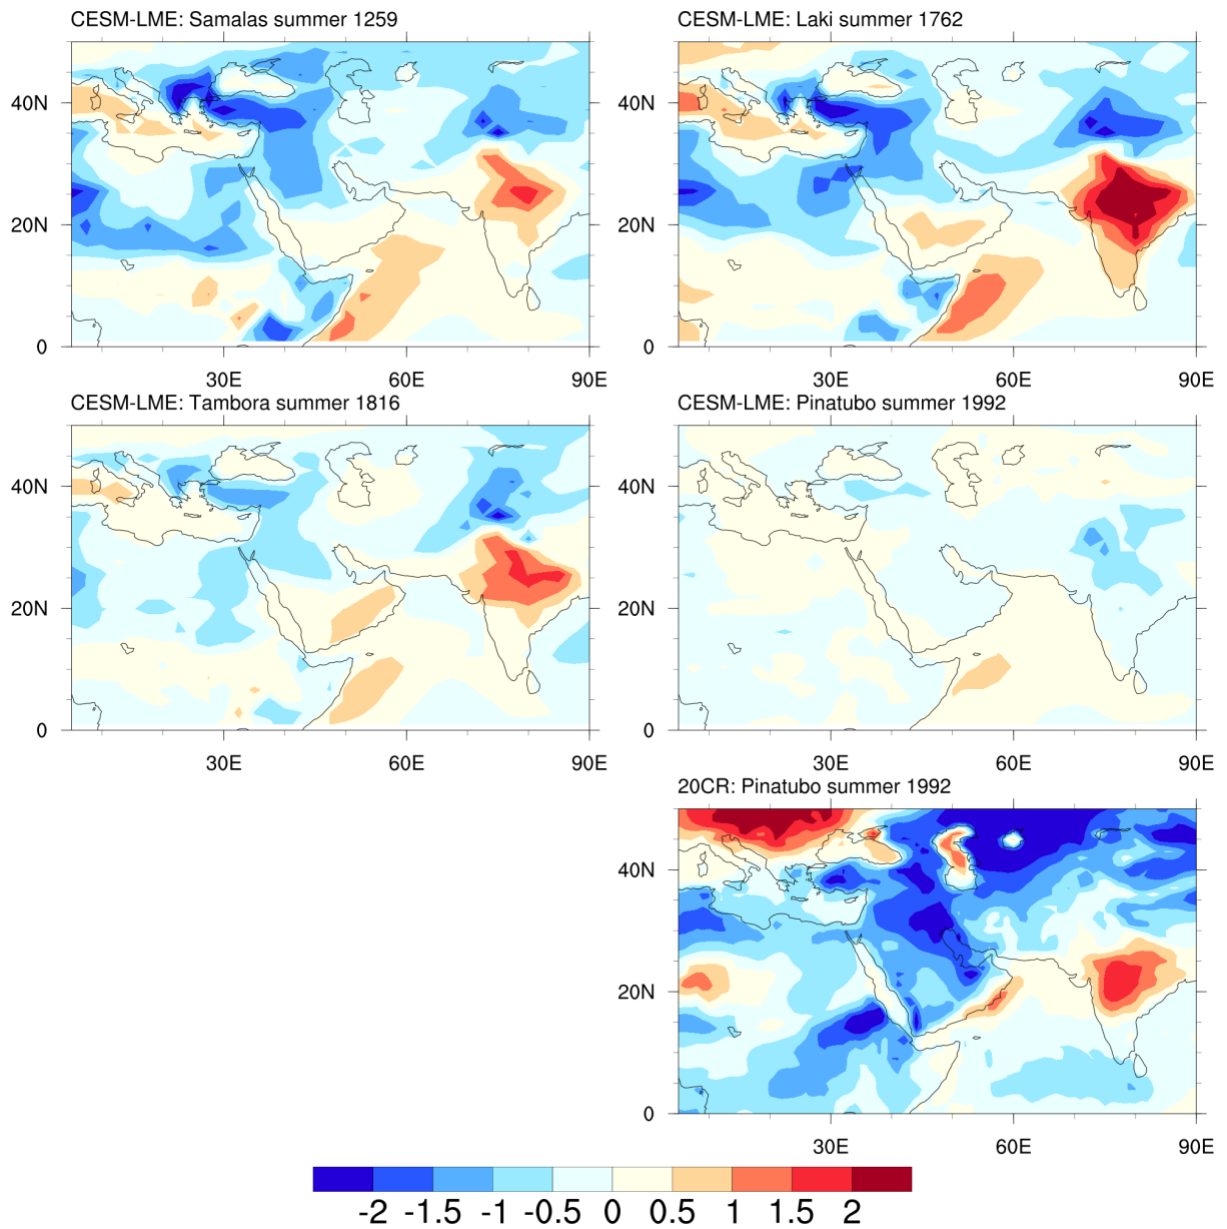

Figure S3 Similar to Figure 5 but for surface temperature anomalies only (K) after the zonal mean response is subtracted.

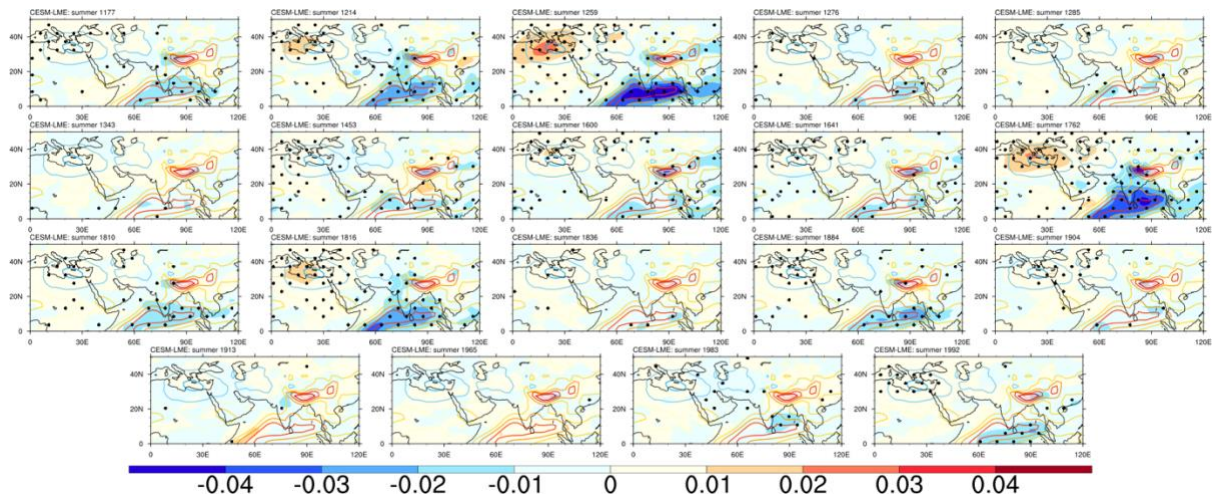

Figure S4 Similar to Figure 6 but for all selected strong eruptions from 850 to 2005 listed in Table 1.
